# Supplementary material
Source: publisher figshare collection journal article supplement (https://acs.figshare.com/ndownloader/files/6994610)
Supplement: Supplementary file 1 [file 6994610]

 
data_20130424e_0m 
 
_audit_creation_method            SHELXL-97 
_chemical_name_systematic 
; 
 ? 
; 
_chemical_name_common             ? 
_chemical_melting_point           ? 
_chemical_formula_moiety          ? 
_chemical_formula_sum 
 'C38 H36 Co N4 O12 P2' 
_chemical_formula_weight          861.58 
 
loop_ 
 _atom_type_symbol 
 _atom_type_description 
 _atom_type_scat_dispersion_real 
 _atom_type_scat_dispersion_imag 
 _atom_type_scat_source 
 'C'  'C'   0.0033   0.0016 
 'International Tables Vol C Tables 4.2.6.8 and 6.1.1.4' 
 'H'  'H'   0.0000   0.0000 
 'International Tables Vol C Tables 4.2.6.8 and 6.1.1.4' 
 'N'  'N'   0.0061   0.0033 
 'International Tables Vol C Tables 4.2.6.8 and 6.1.1.4' 
 'O'  'O'   0.0106   0.0060 
 'International Tables Vol C Tables 4.2.6.8 and 6.1.1.4' 
 'P'  'P'   0.1023   0.0942 
 'International Tables Vol C Tables 4.2.6.8 and 6.1.1.4' 
 'Co'  'Co'   0.3494   0.9721 
 'International Tables Vol C Tables 4.2.6.8 and 6.1.1.4' 
 
_symmetry_cell_setting            triclinic 
_symmetry_space_group_name_H-M    P-1 
 
loop_ 
 _symmetry_equiv_pos_as_xyz 
 'x, y, z' 
 '-x, -y, -z' 
 
_cell_length_a                    10.7563(8) 
_cell_length_b                    10.9109(8) 
_cell_length_c                    19.8578(14) 
_cell_angle_alpha                 89.1580(10) 
_cell_angle_beta                  78.882(2) 
_cell_angle_gamma                 60.5150(10) 
_cell_volume                      1981.8(2) 
_cell_formula_units_Z             2 
_cell_measurement_temperature     291(2) 
_cell_measurement_reflns_used     4196 
_cell_measurement_theta_min       2.184 
_cell_measurement_theta_max       24.732 
 
_exptl_crystal_description        block 
_exptl_crystal_colour             ? 
_exptl_crystal_size_max           0.28 
_exptl_crystal_size_mid           0.24 
_exptl_crystal_size_min           0.22 
_exptl_crystal_density_meas       ? 
_exptl_crystal_density_diffrn     1.444 
_exptl_crystal_density_method     'not measured' 
_exptl_crystal_F_000              890 
_exptl_absorpt_coefficient_mu     0.581 
_exptl_absorpt_correction_type    ? 
_exptl_absorpt_correction_T_min   0.8542 
_exptl_absorpt_correction_T_max   0.8828 
_exptl_absorpt_process_details    ? 
 
_exptl_special_details 
; 
 ? 
; 
 
_diffrn_ambient_temperature       291(2) 
_diffrn_radiation_wavelength      0.71073 
_diffrn_radiation_type            MoK\a 
_diffrn_radiation_source          'fine-focus sealed tube' 
_diffrn_radiation_monochromator   graphite 
_diffrn_measurement_device_type   'Bruker Smart Aepex CCD' 
_diffrn_measurement_method        ? 
_diffrn_detector_area_resol_mean  ? 
_diffrn_reflns_number             12087 
_diffrn_reflns_av_R_equivalents   0.0224 
_diffrn_reflns_av_sigmaI/netI     0.0393 
_diffrn_reflns_limit_h_min        -13 
_diffrn_reflns_limit_h_max        13 
_diffrn_reflns_limit_k_min        -13 
_diffrn_reflns_limit_k_max        12 
_diffrn_reflns_limit_l_min        -24 
_diffrn_reflns_limit_l_max        22 
_diffrn_reflns_theta_min          2.10 
_diffrn_reflns_theta_max          26.00 
_reflns_number_total              7751 
_reflns_number_gt                 5796 
_reflns_threshold_expression      >2sigma(I) 
 
_computing_data_collection        ? 
_computing_cell_refinement        ? 
_computing_data_reduction         ? 
_computing_structure_solution     'SHELXS-97 (Sheldrick, 2008)' 
_computing_structure_refinement   'SHELXL-97 (Sheldrick, 2008)' 
_computing_molecular_graphics     ? 
_computing_publication_material   ? 
 
_refine_special_details 
; 
 Refinement of F^2^ against ALL reflections.  The weighted R-factor wR and 
 goodness of fit S are based on F^2^, conventional R-factors R are based 
 on F, with F set to zero for negative F^2^. The threshold expression of 
 F^2^ > 2sigma(F^2^) is used only for calculating R-factors(gt) etc. and is 
 not relevant to the choice of reflections for refinement.  R-factors based 
 on F^2^ are statistically about twice as large as those based on F, and R- 
 factors based on ALL data will be even larger. 
; 
 
_refine_ls_structure_factor_coef  Fsqd  
_refine_ls_matrix_type            full 
_refine_ls_weighting_scheme       calc  
_refine_ls_weighting_details 
 'calc w=1/[\s^2^(Fo^2^)+(0.0600P)^2^+1.8800P] where P=(Fo^2^+2Fc^2^)/3' 
_atom_sites_solution_primary      direct 
_atom_sites_solution_secondary    difmap 
_atom_sites_solution_hydrogens    geom 
_refine_ls_hydrogen_treatment     mixed 
_refine_ls_extinction_method      none 
_refine_ls_extinction_coef        ? 
_refine_ls_number_reflns          7751 
_refine_ls_number_parameters      516 
_refine_ls_number_restraints      0 
_refine_ls_R_factor_all           0.0640 
_refine_ls_R_factor_gt            0.0563 
_refine_ls_wR_factor_ref          0.1438 
_refine_ls_wR_factor_gt           0.1427 
_refine_ls_goodness_of_fit_ref    1.088 
_refine_ls_restrained_S_all       1.088 
_refine_ls_shift/su_max           0.001 
_refine_ls_shift/su_mean          0.000 
 
loop_ 
 _atom_site_label 
 _atom_site_type_symbol 
 _atom_site_fract_x 
 _atom_site_fract_y 
 _atom_site_fract_z 
 _atom_site_U_iso_or_equiv 
 _atom_site_adp_type 
 _atom_site_occupancy 
 _atom_site_symmetry_multiplicity 
 _atom_site_calc_flag 
 _atom_site_refinement_flags 
 _atom_site_disorder_assembly 
 _atom_site_disorder_group 
C1 C 0.2154(4) 0.5675(4) 0.02256(17) 0.0453(8) Uani 1 1 d . . . 
C2 C 0.2960(4) 0.6078(4) -0.02544(18) 0.0495(8) Uani 1 1 d . . . 
H2 H 0.2689 0.7029 -0.0265 0.059 Uiso 1 1 calc R . . 
C3 C 0.4178(4) 0.5070(4) -0.07233(18) 0.0503(9) Uani 1 1 d . . . 
H3 H 0.4727 0.5342 -0.1044 0.060 Uiso 1 1 calc R . . 
C4 C 0.4563(4) 0.3671(4) -0.07104(19) 0.0512(9) Uani 1 1 d . . . 
H4 H 0.5365 0.2996 -0.1029 0.061 Uiso 1 1 calc R . . 
C5 C 0.3770(4) 0.3261(4) -0.02297(18) 0.0488(8) Uani 1 1 d . . . 
H5 H 0.4030 0.2313 -0.0228 0.059 Uiso 1 1 calc R . . 
C6 C 0.2604(4) 0.4241(4) 0.02455(18) 0.0467(8) Uani 1 1 d . . . 
H6 H 0.2105 0.3951 0.0585 0.056 Uiso 1 1 calc R . . 
C7 C -0.0185(4) 0.6153(3) 0.14142(17) 0.0453(8) Uani 1 1 d . . . 
C8 C 0.0666(4) 0.5261(4) 0.18515(17) 0.0491(8) Uani 1 1 d . . . 
H8 H 0.1601 0.5117 0.1827 0.059 Uiso 1 1 calc R . . 
C9 C 0.0153(4) 0.4597(4) 0.23126(18) 0.0516(9) Uani 1 1 d . . . 
H9 H 0.0740 0.4004 0.2598 0.062 Uiso 1 1 calc R . . 
C10 C -0.1207(4) 0.4790(4) 0.23600(18) 0.0511(9) Uani 1 1 d . . . 
H10 H -0.1549 0.4326 0.2673 0.061 Uiso 1 1 calc R . . 
C11 C -0.2079(4) 0.5683(4) 0.19390(19) 0.0541(9) Uani 1 1 d . . . 
H11 H -0.3015 0.5822 0.1973 0.065 Uiso 1 1 calc R . . 
C12 C -0.1575(4) 0.6384(4) 0.14618(18) 0.0489(8) Uani 1 1 d . . . 
H12 H -0.2170 0.6992 0.1183 0.059 Uiso 1 1 calc R . . 
C13 C -0.0777(4) 0.8057(4) 0.03054(17) 0.0442(8) Uani 1 1 d . . . 
C14 C -0.1967(4) 0.9320(4) 0.06053(18) 0.0494(9) Uani 1 1 d . . . 
H14 H -0.2063 0.9636 0.1055 0.059 Uiso 1 1 calc R . . 
C15 C -0.3042(4) 1.0135(4) 0.02313(18) 0.0510(9) Uani 1 1 d . . . 
H15 H -0.3858 1.0986 0.0431 0.061 Uiso 1 1 calc R . . 
C16 C -0.2867(4) 0.9654(4) -0.04326(18) 0.0504(9) Uani 1 1 d . . . 
H16 H -0.3574 1.0188 -0.0682 0.061 Uiso 1 1 calc R . . 
C17 C -0.1669(4) 0.8403(4) -0.07367(18) 0.0469(8) Uani 1 1 d . . . 
H17 H -0.1570 0.8096 -0.1189 0.056 Uiso 1 1 calc R . . 
C18 C -0.0605(4) 0.7593(4) -0.03698(17) 0.0471(8) Uani 1 1 d . . . 
H18 H 0.0215 0.6749 -0.0575 0.056 Uiso 1 1 calc R . . 
C19 C 0.0977(4) 0.8085(4) 0.12576(18) 0.0500(8) Uani 1 1 d . . . 
H19A H 0.1827 0.7500 0.1440 0.075 Uiso 1 1 calc R . . 
H19B H 0.0168 0.8657 0.1629 0.075 Uiso 1 1 calc R . . 
H19C H 0.1169 0.8686 0.0948 0.075 Uiso 1 1 calc R . . 
C20 C 0.2458(4) -0.0356(4) 0.38482(17) 0.0449(8) Uani 1 1 d . . . 
C21 C 0.3809(4) -0.1271(4) 0.34613(19) 0.0513(9) Uani 1 1 d . . . 
H21 H 0.3907 -0.1536 0.3003 0.062 Uiso 1 1 calc R . . 
C22 C 0.5030(4) -0.1807(4) 0.37446(19) 0.0521(9) Uani 1 1 d . . . 
H22 H 0.5949 -0.2415 0.3474 0.063 Uiso 1 1 calc R . . 
C23 C 0.4892(4) -0.1445(4) 0.44206(19) 0.0527(9) Uani 1 1 d . . . 
H23 H 0.5717 -0.1814 0.4611 0.063 Uiso 1 1 calc R . . 
C24 C 0.3561(4) -0.0552(4) 0.4815(2) 0.0540(9) Uani 1 1 d . . . 
H24 H 0.3478 -0.0292 0.5273 0.065 Uiso 1 1 calc R . . 
C25 C 0.2320(4) -0.0022(4) 0.45413(17) 0.0493(8) Uani 1 1 d . . . 
H25 H 0.1401 0.0554 0.4819 0.059 Uiso 1 1 calc R . . 
C26 C 0.0258(4) -0.0950(4) 0.35064(17) 0.0449(8) Uani 1 1 d . . . 
C27 C 0.0832(4) -0.2126(4) 0.38826(18) 0.0487(8) Uani 1 1 d . . . 
H27 H 0.1566 -0.2289 0.4114 0.058 Uiso 1 1 calc R . . 
C28 C 0.0288(4) -0.3040(4) 0.39044(18) 0.0502(9) Uani 1 1 d . . . 
H28 H 0.0671 -0.3833 0.4147 0.060 Uiso 1 1 calc R . . 
C29 C -0.0806(4) -0.2796(4) 0.35739(19) 0.0504(8) Uani 1 1 d . . . 
H29 H -0.1174 -0.3413 0.3605 0.060 Uiso 1 1 calc R . . 
C30 C -0.1364(4) -0.1664(4) 0.31998(18) 0.0494(8) Uani 1 1 d . . . 
H30 H -0.2095 -0.1518 0.2969 0.059 Uiso 1 1 calc R . . 
C31 C -0.0834(4) -0.0731(4) 0.31658(18) 0.0483(8) Uani 1 1 d . . . 
H31 H -0.1213 0.0047 0.2913 0.058 Uiso 1 1 calc R . . 
C32 C -0.0542(4) 0.1976(4) 0.39236(17) 0.0450(8) Uani 1 1 d . . . 
C33 C -0.1972(4) 0.2297(4) 0.4082(2) 0.0551(10) Uani 1 1 d . . . 
H33 H -0.2213 0.1620 0.3983 0.066 Uiso 1 1 calc R . . 
C34 C -0.3056(4) 0.3613(4) 0.4387(2) 0.0606(10) Uani 1 1 d . . . 
H34 H -0.4030 0.3843 0.4467 0.073 Uiso 1 1 calc R . . 
C35 C -0.2697(4) 0.4579(4) 0.4571(2) 0.0567(10) Uani 1 1 d . . . 
H35 H -0.3423 0.5450 0.4800 0.068 Uiso 1 1 calc R . . 
C36 C -0.1284(4) 0.4274(4) 0.44212(19) 0.0528(9) Uani 1 1 d . . . 
H36 H -0.1045 0.4938 0.4546 0.063 Uiso 1 1 calc R . . 
C37 C -0.0201(4) 0.2982(4) 0.40842(18) 0.0490(8) Uani 1 1 d . . . 
H37 H 0.0762 0.2790 0.3965 0.059 Uiso 1 1 calc R . . 
C38 C 0.1372(4) 0.0549(4) 0.26023(18) 0.0514(9) Uani 1 1 d . . . 
H38A H 0.2033 -0.0354 0.2345 0.077 Uiso 1 1 calc R . . 
H38B H 0.1836 0.1112 0.2572 0.077 Uiso 1 1 calc R . . 
H38C H 0.0508 0.1022 0.2416 0.077 Uiso 1 1 calc R . . 
Co1 Co 0.48875(5) 0.26298(5) 0.25629(2) 0.04393(15) Uani 1 1 d . . . 
N1 N 0.3858(3) 0.5553(3) 0.25250(16) 0.0504(7) Uani 1 1 d . . . 
N2 N 0.7547(3) 0.2064(3) 0.19153(15) 0.0462(7) Uani 1 1 d . . . 
N3 N 0.3520(3) 0.2781(3) 0.38086(15) 0.0478(7) Uani 1 1 d . . . 
N4 N 0.4914(3) 0.0411(3) 0.19949(15) 0.0506(7) Uani 1 1 d . . . 
O1 O 0.3747(2) 0.4584(2) 0.22428(12) 0.0442(5) Uani 1 1 d . . . 
O2 O 0.3325(3) 0.6727(3) 0.23259(13) 0.0540(6) Uani 1 1 d . . . 
O3 O 0.4487(3) 0.5230(3) 0.29925(14) 0.0632(7) Uani 1 1 d . . . 
O4 O 0.6586(3) 0.2231(3) 0.15952(13) 0.0517(6) Uani 1 1 d . . . 
O5 O 0.7121(3) 0.2304(2) 0.25263(12) 0.0467(6) Uani 1 1 d . . . 
O6 O 0.8757(3) 0.1703(3) 0.16044(14) 0.0598(7) Uani 1 1 d . . . 
O7 O 0.4858(3) 0.2387(2) 0.36394(12) 0.0457(5) Uani 1 1 d . . . 
O8 O 0.2891(2) 0.3056(2) 0.33290(12) 0.0453(5) Uani 1 1 d . . . 
O9 O 0.2889(3) 0.2893(3) 0.44071(13) 0.0556(6) Uani 1 1 d . . . 
O10 O 0.5768(3) 0.0235(3) 0.23729(13) 0.0545(6) Uani 1 1 d . . . 
O11 O 0.4066(3) 0.1678(3) 0.18973(13) 0.0513(6) Uani 1 1 d . . . 
O12 O 0.4907(3) -0.0541(3) 0.17236(13) 0.0574(7) Uani 1 1 d . . . 
P1 P 0.05459(10) 0.69914(9) 0.08021(5) 0.0448(2) Uani 1 1 d . . . 
P2 P 0.08857(10) 0.03004(9) 0.34778(5) 0.0443(2) Uani 1 1 d . . . 
 
loop_ 
 _atom_site_aniso_label 
 _atom_site_aniso_U_11 
 _atom_site_aniso_U_22 
 _atom_site_aniso_U_33 
 _atom_site_aniso_U_23 
 _atom_site_aniso_U_13 
 _atom_site_aniso_U_12 
C1 0.0394(18) 0.0466(19) 0.0413(18) 0.0092(15) -0.0094(14) -0.0148(15) 
C2 0.047(2) 0.0472(19) 0.0442(19) 0.0114(16) -0.0108(16) -0.0154(16) 
C3 0.045(2) 0.053(2) 0.0440(19) 0.0153(16) -0.0083(15) -0.0179(17) 
C4 0.047(2) 0.048(2) 0.045(2) -0.0071(16) -0.0111(16) -0.0132(16) 
C5 0.0375(18) 0.0463(19) 0.051(2) -0.0092(16) -0.0082(15) -0.0121(15) 
C6 0.0436(19) 0.0438(19) 0.0464(19) 0.0056(15) -0.0117(15) -0.0164(15) 
C7 0.0442(19) 0.0400(18) 0.0409(18) 0.0053(14) -0.0091(15) -0.0129(15) 
C8 0.047(2) 0.0463(19) 0.0421(19) 0.0090(15) -0.0096(15) -0.0140(16) 
C9 0.051(2) 0.047(2) 0.045(2) 0.0133(16) -0.0137(16) -0.0148(17) 
C10 0.056(2) 0.049(2) 0.0365(18) 0.0085(15) -0.0089(16) -0.0175(17) 
C11 0.049(2) 0.053(2) 0.053(2) 0.0142(17) -0.0129(17) -0.0197(17) 
C12 0.046(2) 0.050(2) 0.0431(19) 0.0110(16) -0.0116(15) -0.0181(16) 
C13 0.0432(19) 0.0450(18) 0.0366(17) 0.0095(14) -0.0087(14) -0.0164(15) 
C14 0.049(2) 0.0437(19) 0.0416(18) -0.0072(15) -0.0130(16) -0.0116(16) 
C15 0.046(2) 0.0451(19) 0.0427(19) 0.0043(15) -0.0103(15) -0.0084(16) 
C16 0.044(2) 0.048(2) 0.047(2) 0.0157(16) -0.0118(16) -0.0134(16) 
C17 0.0439(19) 0.052(2) 0.0404(18) 0.0129(15) -0.0100(15) -0.0208(16) 
C18 0.0452(19) 0.0422(18) 0.0364(17) 0.0049(14) -0.0056(14) -0.0099(15) 
C19 0.047(2) 0.048(2) 0.046(2) 0.0038(16) -0.0143(16) -0.0157(16) 
C20 0.0390(18) 0.0456(18) 0.0411(18) 0.0102(15) -0.0075(14) -0.0150(15) 
C21 0.0429(19) 0.051(2) 0.047(2) -0.0128(16) -0.0097(16) -0.0131(16) 
C22 0.0388(19) 0.049(2) 0.058(2) -0.0104(17) -0.0139(16) -0.0118(16) 
C23 0.052(2) 0.051(2) 0.051(2) 0.0127(17) -0.0150(17) -0.0207(18) 
C24 0.054(2) 0.050(2) 0.049(2) 0.0075(17) -0.0177(17) -0.0175(18) 
C25 0.052(2) 0.0475(19) 0.0373(18) 0.0092(15) -0.0116(15) -0.0162(17) 
C26 0.0441(19) 0.0432(18) 0.0380(17) 0.0083(14) -0.0099(14) -0.0144(15) 
C27 0.048(2) 0.0467(19) 0.0428(19) 0.0137(15) -0.0130(16) -0.0168(16) 
C28 0.053(2) 0.048(2) 0.0422(19) 0.0166(16) -0.0118(16) -0.0198(17) 
C29 0.051(2) 0.0444(19) 0.054(2) 0.0126(16) -0.0149(17) -0.0216(17) 
C30 0.046(2) 0.052(2) 0.049(2) 0.0111(16) -0.0137(16) -0.0223(17) 
C31 0.0442(19) 0.0471(19) 0.048(2) 0.0102(16) -0.0135(16) -0.0174(16) 
C32 0.0392(18) 0.0438(18) 0.0414(18) 0.0108(15) -0.0099(14) -0.0126(15) 
C33 0.040(2) 0.0436(19) 0.065(2) -0.0161(17) 0.0082(17) -0.0148(16) 
C34 0.044(2) 0.053(2) 0.066(3) -0.0175(19) 0.0113(18) -0.0170(18) 
C35 0.051(2) 0.048(2) 0.058(2) -0.0136(17) -0.0088(18) -0.0147(17) 
C36 0.052(2) 0.0435(19) 0.052(2) 0.0130(16) -0.0145(17) -0.0153(17) 
C37 0.0427(19) 0.0445(19) 0.051(2) 0.0082(16) -0.0093(16) -0.0151(16) 
C38 0.048(2) 0.049(2) 0.0438(19) 0.0082(16) -0.0077(16) -0.0148(17) 
Co1 0.0391(3) 0.0451(3) 0.0408(3) 0.0127(2) -0.01101(19) -0.0151(2) 
N1 0.0487(17) 0.0472(17) 0.0480(17) 0.0100(14) -0.0149(14) -0.0170(14) 
N2 0.0398(16) 0.0416(15) 0.0443(17) 0.0072(13) -0.0072(14) -0.0114(13) 
N3 0.0411(17) 0.0552(18) 0.0417(16) 0.0105(13) -0.0125(13) -0.0188(14) 
N4 0.0470(17) 0.0490(18) 0.0450(17) -0.0048(14) -0.0082(14) -0.0161(15) 
O1 0.0417(13) 0.0427(13) 0.0441(13) 0.0100(10) -0.0125(10) -0.0170(10) 
O2 0.0522(15) 0.0463(14) 0.0500(14) 0.0115(11) -0.0124(12) -0.0140(12) 
O3 0.0726(19) 0.0525(15) 0.0565(16) 0.0099(13) -0.0291(14) -0.0201(14) 
O4 0.0458(14) 0.0508(14) 0.0471(14) -0.0056(11) -0.0041(11) -0.0174(12) 
O5 0.0421(13) 0.0470(13) 0.0428(14) 0.0124(11) -0.0132(11) -0.0149(11) 
O6 0.0435(15) 0.0543(15) 0.0607(16) 0.0101(12) 0.0072(12) -0.0151(12) 
O7 0.0411(13) 0.0471(13) 0.0446(13) 0.0128(10) -0.0136(10) -0.0175(11) 
O8 0.0409(13) 0.0452(13) 0.0433(13) 0.0124(10) -0.0115(10) -0.0160(11) 
O9 0.0572(16) 0.0543(15) 0.0452(14) 0.0085(12) -0.0088(12) -0.0211(13) 
O10 0.0517(15) 0.0489(14) 0.0561(15) 0.0062(12) -0.0150(12) -0.0189(12) 
O11 0.0473(14) 0.0518(14) 0.0506(14) 0.0032(11) -0.0146(11) -0.0201(12) 
O12 0.0527(15) 0.0527(15) 0.0518(15) -0.0119(12) 0.0056(12) -0.0206(13) 
P1 0.0406(5) 0.0437(5) 0.0411(5) 0.0082(4) -0.0092(4) -0.0141(4) 
P2 0.0407(5) 0.0435(5) 0.0401(5) 0.0092(4) -0.0080(4) -0.0149(4) 
 
_geom_special_details 
; 
 All esds (except the esd in the dihedral angle between two l.s. planes) 
 are estimated using the full covariance matrix.  The cell esds are taken 
 into account individually in the estimation of esds in distances, angles 
 and torsion angles; correlations between esds in cell parameters are only 
 used when they are defined by crystal symmetry.  An approximate (isotropic) 
 treatment of cell esds is used for estimating esds involving l.s. planes. 
; 
 
loop_ 
 _geom_bond_atom_site_label_1 
 _geom_bond_atom_site_label_2 
 _geom_bond_distance 
 _geom_bond_site_symmetry_2 
 _geom_bond_publ_flag 
C1 C2 1.378(5) . ? 
C1 C6 1.395(5) . ? 
C1 P1 1.790(3) . ? 
C2 C3 1.391(5) . ? 
C2 H2 0.9300 . ? 
C3 C4 1.372(5) . ? 
C3 H3 0.9300 . ? 
C4 C5 1.373(5) . ? 
C4 H4 0.9300 . ? 
C5 C6 1.364(5) . ? 
C5 H5 0.9300 . ? 
C6 H6 0.9300 . ? 
C7 C12 1.372(5) . ? 
C7 C8 1.395(5) . ? 
C7 P1 1.799(4) . ? 
C8 C9 1.359(5) . ? 
C8 H8 0.9300 . ? 
C9 C10 1.355(5) . ? 
C9 H9 0.9300 . ? 
C10 C11 1.381(5) . ? 
C10 H10 0.9300 . ? 
C11 C12 1.402(5) . ? 
C11 H11 0.9300 . ? 
C12 H12 0.9300 . ? 
C13 C14 1.374(5) . ? 
C13 C18 1.386(5) . ? 
C13 P1 1.796(3) . ? 
C14 C15 1.406(5) . ? 
C14 H14 0.9300 . ? 
C15 C16 1.370(5) . ? 
C15 H15 0.9300 . ? 
C16 C17 1.372(5) . ? 
C16 H16 0.9300 . ? 
C17 C18 1.389(5) . ? 
C17 H17 0.9300 . ? 
C18 H18 0.9300 . ? 
C19 P1 1.788(4) . ? 
C19 H19A 0.9600 . ? 
C19 H19B 0.9600 . ? 
C19 H19C 0.9600 . ? 
C20 C21 1.365(5) . ? 
C20 C25 1.390(5) . ? 
C20 P2 1.785(3) . ? 
C21 C22 1.380(5) . ? 
C21 H21 0.9300 . ? 
C22 C23 1.364(5) . ? 
C22 H22 0.9300 . ? 
C23 C24 1.353(5) . ? 
C23 H23 0.9300 . ? 
C24 C25 1.387(5) . ? 
C24 H24 0.9300 . ? 
C25 H25 0.9300 . ? 
C26 C31 1.385(5) . ? 
C26 C27 1.398(5) . ? 
C26 P2 1.792(4) . ? 
C27 C28 1.379(5) . ? 
C27 H27 0.9300 . ? 
C28 C29 1.368(5) . ? 
C28 H28 0.9300 . ? 
C29 C30 1.362(5) . ? 
C29 H29 0.9300 . ? 
C30 C31 1.386(5) . ? 
C30 H30 0.9300 . ? 
C31 H31 0.9300 . ? 
C32 C33 1.368(5) . ? 
C32 C37 1.376(5) . ? 
C32 P2 1.801(3) . ? 
C33 C34 1.375(5) . ? 
C33 H33 0.9300 . ? 
C34 C35 1.365(5) . ? 
C34 H34 0.9300 . ? 
C35 C36 1.356(5) . ? 
C35 H35 0.9300 . ? 
C36 C37 1.380(5) . ? 
C36 H36 0.9300 . ? 
C37 H37 0.9300 . ? 
C38 P2 1.773(3) . ? 
C38 H38A 0.9600 . ? 
C38 H38B 0.9600 . ? 
C38 H38C 0.9600 . ? 
Co1 O1 2.035(2) . ? 
Co1 O7 2.146(2) . ? 
Co1 O8 2.218(2) . ? 
Co1 O5 2.235(2) . ? 
Co1 O11 2.236(2) . ? 
Co1 O4 2.260(2) . ? 
Co1 O10 2.307(3) . ? 
N1 O3 1.200(4) . ? 
N1 O2 1.215(4) . ? 
N1 O1 1.270(4) . ? 
N2 O6 1.193(4) . ? 
N2 O5 1.195(3) . ? 
N2 O4 1.252(4) . ? 
N3 O8 1.223(3) . ? 
N3 O9 1.225(4) . ? 
N3 O7 1.256(4) . ? 
N4 O12 1.182(4) . ? 
N4 O10 1.238(4) . ? 
N4 O11 1.264(4) . ? 
 
loop_ 
 _geom_angle_atom_site_label_1 
 _geom_angle_atom_site_label_2 
 _geom_angle_atom_site_label_3 
 _geom_angle 
 _geom_angle_site_symmetry_1 
 _geom_angle_site_symmetry_3 
 _geom_angle_publ_flag 
C2 C1 C6 118.9(3) . . ? 
C2 C1 P1 119.8(3) . . ? 
C6 C1 P1 121.3(3) . . ? 
C1 C2 C3 120.3(3) . . ? 
C1 C2 H2 119.9 . . ? 
C3 C2 H2 119.9 . . ? 
C4 C3 C2 119.6(3) . . ? 
C4 C3 H3 120.2 . . ? 
C2 C3 H3 120.2 . . ? 
C3 C4 C5 120.4(3) . . ? 
C3 C4 H4 119.8 . . ? 
C5 C4 H4 119.8 . . ? 
C6 C5 C4 120.2(4) . . ? 
C6 C5 H5 119.9 . . ? 
C4 C5 H5 119.9 . . ? 
C5 C6 C1 120.5(4) . . ? 
C5 C6 H6 119.8 . . ? 
C1 C6 H6 119.8 . . ? 
C12 C7 C8 119.2(3) . . ? 
C12 C7 P1 121.1(3) . . ? 
C8 C7 P1 119.8(3) . . ? 
C9 C8 C7 121.1(4) . . ? 
C9 C8 H8 119.4 . . ? 
C7 C8 H8 119.4 . . ? 
C10 C9 C8 120.7(3) . . ? 
C10 C9 H9 119.7 . . ? 
C8 C9 H9 119.7 . . ? 
C9 C10 C11 119.3(4) . . ? 
C9 C10 H10 120.3 . . ? 
C11 C10 H10 120.3 . . ? 
C10 C11 C12 121.0(4) . . ? 
C10 C11 H11 119.5 . . ? 
C12 C11 H11 119.5 . . ? 
C7 C12 C11 118.7(3) . . ? 
C7 C12 H12 120.7 . . ? 
C11 C12 H12 120.7 . . ? 
C14 C13 C18 120.5(3) . . ? 
C14 C13 P1 119.3(3) . . ? 
C18 C13 P1 120.1(3) . . ? 
C13 C14 C15 119.9(3) . . ? 
C13 C14 H14 120.1 . . ? 
C15 C14 H14 120.1 . . ? 
C16 C15 C14 118.9(3) . . ? 
C16 C15 H15 120.5 . . ? 
C14 C15 H15 120.5 . . ? 
C15 C16 C17 121.3(3) . . ? 
C15 C16 H16 119.3 . . ? 
C17 C16 H16 119.3 . . ? 
C16 C17 C18 120.0(3) . . ? 
C16 C17 H17 120.0 . . ? 
C18 C17 H17 120.0 . . ? 
C13 C18 C17 119.3(3) . . ? 
C13 C18 H18 120.3 . . ? 
C17 C18 H18 120.3 . . ? 
P1 C19 H19A 109.5 . . ? 
P1 C19 H19B 109.5 . . ? 
H19A C19 H19B 109.5 . . ? 
P1 C19 H19C 109.5 . . ? 
H19A C19 H19C 109.5 . . ? 
H19B C19 H19C 109.5 . . ? 
C21 C20 C25 119.0(3) . . ? 
C21 C20 P2 120.0(3) . . ? 
C25 C20 P2 120.9(3) . . ? 
C20 C21 C22 120.6(3) . . ? 
C20 C21 H21 119.7 . . ? 
C22 C21 H21 119.7 . . ? 
C23 C22 C21 120.1(3) . . ? 
C23 C22 H22 120.0 . . ? 
C21 C22 H22 120.0 . . ? 
C24 C23 C22 120.3(4) . . ? 
C24 C23 H23 119.8 . . ? 
C22 C23 H23 119.8 . . ? 
C23 C24 C25 120.3(4) . . ? 
C23 C24 H24 119.8 . . ? 
C25 C24 H24 119.8 . . ? 
C24 C25 C20 119.6(3) . . ? 
C24 C25 H25 120.2 . . ? 
C20 C25 H25 120.2 . . ? 
C31 C26 C27 119.6(3) . . ? 
C31 C26 P2 119.6(3) . . ? 
C27 C26 P2 120.7(3) . . ? 
C28 C27 C26 118.7(3) . . ? 
C28 C27 H27 120.7 . . ? 
C26 C27 H27 120.7 . . ? 
C29 C28 C27 120.9(3) . . ? 
C29 C28 H28 119.5 . . ? 
C27 C28 H28 119.5 . . ? 
C30 C29 C28 121.0(4) . . ? 
C30 C29 H29 119.5 . . ? 
C28 C29 H29 119.5 . . ? 
C29 C30 C31 119.3(3) . . ? 
C29 C30 H30 120.3 . . ? 
C31 C30 H30 120.3 . . ? 
C26 C31 C30 120.4(3) . . ? 
C26 C31 H31 119.8 . . ? 
C30 C31 H31 119.8 . . ? 
C33 C32 C37 119.0(3) . . ? 
C33 C32 P2 121.6(3) . . ? 
C37 C32 P2 119.4(3) . . ? 
C32 C33 C34 120.6(4) . . ? 
C32 C33 H33 119.7 . . ? 
C34 C33 H33 119.7 . . ? 
C35 C34 C33 119.8(4) . . ? 
C35 C34 H34 120.1 . . ? 
C33 C34 H34 120.1 . . ? 
C36 C35 C34 120.2(3) . . ? 
C36 C35 H35 119.9 . . ? 
C34 C35 H35 119.9 . . ? 
C35 C36 C37 120.2(4) . . ? 
C35 C36 H36 119.9 . . ? 
C37 C36 H36 119.9 . . ? 
C32 C37 C36 120.1(4) . . ? 
C32 C37 H37 120.0 . . ? 
C36 C37 H37 120.0 . . ? 
P2 C38 H38A 109.5 . . ? 
P2 C38 H38B 109.5 . . ? 
H38A C38 H38B 109.5 . . ? 
P2 C38 H38C 109.5 . . ? 
H38A C38 H38C 109.5 . . ? 
H38B C38 H38C 109.5 . . ? 
O1 Co1 O7 120.10(9) . . ? 
O1 Co1 O8 89.10(9) . . ? 
O7 Co1 O8 57.12(9) . . ? 
O1 Co1 O5 105.29(9) . . ? 
O7 Co1 O5 83.61(9) . . ? 
O8 Co1 O5 139.74(9) . . ? 
O1 Co1 O11 92.54(9) . . ? 
O7 Co1 O11 125.30(9) . . ? 
O8 Co1 O11 83.57(9) . . ? 
O5 Co1 O11 131.66(9) . . ? 
O1 Co1 O4 84.92(9) . . ? 
O7 Co1 O4 136.59(9) . . ? 
O8 Co1 O4 165.91(9) . . ? 
O5 Co1 O4 54.34(9) . . ? 
O11 Co1 O4 83.96(9) . . ? 
O1 Co1 O10 146.98(10) . . ? 
O7 Co1 O10 89.01(9) . . ? 
O8 Co1 O10 95.28(9) . . ? 
O5 Co1 O10 92.29(9) . . ? 
O11 Co1 O10 55.70(9) . . ? 
O4 Co1 O10 83.04(9) . . ? 
O3 N1 O2 124.0(3) . . ? 
O3 N1 O1 115.9(3) . . ? 
O2 N1 O1 120.1(3) . . ? 
O6 N2 O5 126.2(3) . . ? 
O6 N2 O4 119.8(3) . . ? 
O5 N2 O4 114.0(3) . . ? 
O8 N3 O9 122.5(3) . . ? 
O8 N3 O7 114.8(3) . . ? 
O9 N3 O7 122.8(3) . . ? 
O12 N4 O10 122.6(3) . . ? 
O12 N4 O11 121.3(3) . . ? 
O10 N4 O11 116.1(3) . . ? 
N1 O1 Co1 115.14(19) . . ? 
N2 O4 Co1 94.10(19) . . ? 
N2 O5 Co1 97.1(2) . . ? 
N3 O7 Co1 95.29(18) . . ? 
N3 O8 Co1 92.78(19) . . ? 
N4 O10 Co1 92.8(2) . . ? 
N4 O11 Co1 95.40(19) . . ? 
C19 P1 C1 110.06(17) . . ? 
C19 P1 C13 109.53(16) . . ? 
C1 P1 C13 108.49(16) . . ? 
C19 P1 C7 108.98(17) . . ? 
C1 P1 C7 109.83(16) . . ? 
C13 P1 C7 109.95(16) . . ? 
C38 P2 C20 108.79(17) . . ? 
C38 P2 C26 108.25(17) . . ? 
C20 P2 C26 110.37(16) . . ? 
C38 P2 C32 108.64(16) . . ? 
C20 P2 C32 110.22(16) . . ? 
C26 P2 C32 110.52(16) . . ? 
 
loop_ 
 _geom_torsion_atom_site_label_1 
 _geom_torsion_atom_site_label_2 
 _geom_torsion_atom_site_label_3 
 _geom_torsion_atom_site_label_4 
 _geom_torsion 
 _geom_torsion_site_symmetry_1 
 _geom_torsion_site_symmetry_2 
 _geom_torsion_site_symmetry_3 
 _geom_torsion_site_symmetry_4 
 _geom_torsion_publ_flag 
C6 C1 C2 C3 1.8(5) . . . . ? 
P1 C1 C2 C3 -177.4(3) . . . . ? 
C1 C2 C3 C4 0.7(5) . . . . ? 
C2 C3 C4 C5 -1.2(5) . . . . ? 
C3 C4 C5 C6 -0.9(5) . . . . ? 
C4 C5 C6 C1 3.5(5) . . . . ? 
C2 C1 C6 C5 -4.0(5) . . . . ? 
P1 C1 C6 C5 175.2(3) . . . . ? 
C12 C7 C8 C9 1.3(5) . . . . ? 
P1 C7 C8 C9 -179.1(3) . . . . ? 
C7 C8 C9 C10 -0.2(6) . . . . ? 
C8 C9 C10 C11 -0.7(6) . . . . ? 
C9 C10 C11 C12 0.4(6) . . . . ? 
C8 C7 C12 C11 -1.5(5) . . . . ? 
P1 C7 C12 C11 178.8(3) . . . . ? 
C10 C11 C12 C7 0.7(6) . . . . ? 
C18 C13 C14 C15 1.6(6) . . . . ? 
P1 C13 C14 C15 -177.3(3) . . . . ? 
C13 C14 C15 C16 -0.8(6) . . . . ? 
C14 C15 C16 C17 -0.1(6) . . . . ? 
C15 C16 C17 C18 0.1(6) . . . . ? 
C14 C13 C18 C17 -1.6(6) . . . . ? 
P1 C13 C18 C17 177.4(3) . . . . ? 
C16 C17 C18 C13 0.7(5) . . . . ? 
C25 C20 C21 C22 -3.0(6) . . . . ? 
P2 C20 C21 C22 -178.8(3) . . . . ? 
C20 C21 C22 C23 1.3(6) . . . . ? 
C21 C22 C23 C24 -0.5(6) . . . . ? 
C22 C23 C24 C25 1.5(6) . . . . ? 
C23 C24 C25 C20 -3.2(6) . . . . ? 
C21 C20 C25 C24 3.9(5) . . . . ? 
P2 C20 C25 C24 179.7(3) . . . . ? 
C31 C26 C27 C28 -0.1(5) . . . . ? 
P2 C26 C27 C28 178.3(3) . . . . ? 
C26 C27 C28 C29 -0.9(5) . . . . ? 
C27 C28 C29 C30 1.6(6) . . . . ? 
C28 C29 C30 C31 -1.3(6) . . . . ? 
C27 C26 C31 C30 0.4(5) . . . . ? 
P2 C26 C31 C30 -178.0(3) . . . . ? 
C29 C30 C31 C26 0.3(5) . . . . ? 
C37 C32 C33 C34 1.1(6) . . . . ? 
P2 C32 C33 C34 -176.2(3) . . . . ? 
C32 C33 C34 C35 -4.0(7) . . . . ? 
C33 C34 C35 C36 3.6(6) . . . . ? 
C34 C35 C36 C37 -0.3(6) . . . . ? 
C33 C32 C37 C36 2.2(5) . . . . ? 
P2 C32 C37 C36 179.5(3) . . . . ? 
C35 C36 C37 C32 -2.6(5) . . . . ? 
O3 N1 O1 Co1 -7.6(4) . . . . ? 
O2 N1 O1 Co1 173.5(2) . . . . ? 
O7 Co1 O1 N1 43.9(2) . . . . ? 
O8 Co1 O1 N1 94.3(2) . . . . ? 
O5 Co1 O1 N1 -47.6(2) . . . . ? 
O11 Co1 O1 N1 177.8(2) . . . . ? 
O4 Co1 O1 N1 -98.5(2) . . . . ? 
O10 Co1 O1 N1 -167.4(2) . . . . ? 
O6 N2 O4 Co1 174.2(3) . . . . ? 
O5 N2 O4 Co1 -6.3(3) . . . . ? 
O1 Co1 O4 N2 116.71(19) . . . . ? 
O7 Co1 O4 N2 -13.0(2) . . . . ? 
O8 Co1 O4 N2 -178.0(3) . . . . ? 
O5 Co1 O4 N2 3.79(17) . . . . ? 
O11 Co1 O4 N2 -150.18(19) . . . . ? 
O10 Co1 O4 N2 -94.10(19) . . . . ? 
O6 N2 O5 Co1 -174.1(3) . . . . ? 
O4 N2 O5 Co1 6.4(3) . . . . ? 
O1 Co1 O5 N2 -76.0(2) . . . . ? 
O7 Co1 O5 N2 164.50(19) . . . . ? 
O8 Co1 O5 N2 176.70(17) . . . . ? 
O11 Co1 O5 N2 31.8(2) . . . . ? 
O4 Co1 O5 N2 -3.99(18) . . . . ? 
O10 Co1 O5 N2 75.76(19) . . . . ? 
O8 N3 O7 Co1 2.3(3) . . . . ? 
O9 N3 O7 Co1 -177.2(3) . . . . ? 
O1 Co1 O7 N3 65.3(2) . . . . ? 
O8 Co1 O7 N3 -1.37(18) . . . . ? 
O5 Co1 O7 N3 169.3(2) . . . . ? 
O11 Co1 O7 N3 -53.0(2) . . . . ? 
O4 Co1 O7 N3 -177.08(18) . . . . ? 
O10 Co1 O7 N3 -98.31(19) . . . . ? 
O9 N3 O8 Co1 177.3(3) . . . . ? 
O7 N3 O8 Co1 -2.2(3) . . . . ? 
O1 Co1 O8 N3 -126.0(2) . . . . ? 
O7 Co1 O8 N3 1.40(18) . . . . ? 
O5 Co1 O8 N3 -13.1(3) . . . . ? 
O11 Co1 O8 N3 141.3(2) . . . . ? 
O4 Co1 O8 N3 169.2(3) . . . . ? 
O10 Co1 O8 N3 86.8(2) . . . . ? 
O12 N4 O10 Co1 178.7(3) . . . . ? 
O11 N4 O10 Co1 0.5(3) . . . . ? 
O1 Co1 O10 N4 -18.3(3) . . . . ? 
O7 Co1 O10 N4 135.0(2) . . . . ? 
O8 Co1 O10 N4 78.2(2) . . . . ? 
O5 Co1 O10 N4 -141.4(2) . . . . ? 
O11 Co1 O10 N4 -0.34(19) . . . . ? 
O4 Co1 O10 N4 -87.8(2) . . . . ? 
O12 N4 O11 Co1 -178.7(3) . . . . ? 
O10 N4 O11 Co1 -0.6(3) . . . . ? 
O1 Co1 O11 N4 170.6(2) . . . . ? 
O7 Co1 O11 N4 -59.1(2) . . . . ? 
O8 Co1 O11 N4 -100.6(2) . . . . ? 
O5 Co1 O11 N4 57.5(2) . . . . ? 
O4 Co1 O11 N4 86.0(2) . . . . ? 
O10 Co1 O11 N4 0.33(18) . . . . ? 
C2 C1 P1 C19 -55.1(3) . . . . ? 
C6 C1 P1 C19 125.7(3) . . . . ? 
C2 C1 P1 C13 64.7(3) . . . . ? 
C6 C1 P1 C13 -114.5(3) . . . . ? 
C2 C1 P1 C7 -175.1(3) . . . . ? 
C6 C1 P1 C7 5.7(3) . . . . ? 
C14 C13 P1 C19 -45.6(4) . . . . ? 
C18 C13 P1 C19 135.5(3) . . . . ? 
C14 C13 P1 C1 -165.7(3) . . . . ? 
C18 C13 P1 C1 15.3(4) . . . . ? 
C14 C13 P1 C7 74.2(3) . . . . ? 
C18 C13 P1 C7 -104.8(3) . . . . ? 
C12 C7 P1 C19 119.0(3) . . . . ? 
C8 C7 P1 C19 -60.6(3) . . . . ? 
C12 C7 P1 C1 -120.3(3) . . . . ? 
C8 C7 P1 C1 60.0(3) . . . . ? 
C12 C7 P1 C13 -1.0(3) . . . . ? 
C8 C7 P1 C13 179.4(3) . . . . ? 
C21 C20 P2 C38 -35.8(4) . . . . ? 
C25 C20 P2 C38 148.4(3) . . . . ? 
C21 C20 P2 C26 82.8(3) . . . . ? 
C25 C20 P2 C26 -93.0(3) . . . . ? 
C21 C20 P2 C32 -154.9(3) . . . . ? 
C25 C20 P2 C32 29.4(3) . . . . ? 
C31 C26 P2 C38 -52.7(3) . . . . ? 
C27 C26 P2 C38 128.9(3) . . . . ? 
C31 C26 P2 C20 -171.7(3) . . . . ? 
C27 C26 P2 C20 9.9(3) . . . . ? 
C31 C26 P2 C32 66.1(3) . . . . ? 
C27 C26 P2 C32 -112.3(3) . . . . ? 
C33 C32 P2 C38 102.5(3) . . . . ? 
C37 C32 P2 C38 -74.7(3) . . . . ? 
C33 C32 P2 C20 -138.3(3) . . . . ? 
C37 C32 P2 C20 44.4(3) . . . . ? 
C33 C32 P2 C26 -16.1(4) . . . . ? 
C37 C32 P2 C26 166.7(3) . . . . ? 
 
_diffrn_measured_fraction_theta_max    0.993 
_diffrn_reflns_theta_full              26.00 
_diffrn_measured_fraction_theta_full   0.993 
_refine_diff_density_max    0.371 
_refine_diff_density_min   -0.465 
_refine_diff_density_rms    0.102 
